# Supplementary material for: Silicon Nitride Bioceramics Sintered by Microwave Exhibit Excellent Mechanical Properties, Cytocompatibility In Vitro, and Anti-Bacterial Properties
Source: MDPI journal article supplement (doi:10.3390/jfb14110552), 2023-11-17
Supplement: s1 [file s1]

*Supplementary Materials*

# Silicon Nitride Bioceramics Sintered by Microwave Exhibit Excellent Mechanical Properties, Cytocompatibility *In Vitro*, and Anti-Bacterial Properties

Jiayu He <sup>1</sup>, Yuandong Liu <sup>1,\*</sup>, Xiaofeng Zeng <sup>2,3</sup>, Yan Tong <sup>1</sup>, Run Liu <sup>1</sup>, Kan Wang <sup>1</sup>, Xiangdong Shangguan <sup>1</sup>, Guanzhou Qiu <sup>1</sup> and Coswald Stephen Sipaut <sup>3</sup>

<sup>1</sup> Key Laboratory of Biohydrometallurgy of Ministry of Education, School of Minerals Processing and Bioengineering, Central South University, Changsha 410083, China; 215611005@csu.edu.cn (J.H.); 235612137@csu.edu.cn (Y.T.); 202208600021012@ctgu.edu.cn (R.L.); 225611016@csu.edu.cn (K.W.); 215612085@csu.edu.cn (X.S.); qgz@mail.csu.edu.cn (G.Q.)

<sup>2</sup> Hengyang Kaixin Special Material Technology Co., Ltd., Hengyang 421200, China; jishuyfdept@hykaixin.com

<sup>3</sup> Faculty of Engineering, University Malaysia Sabah, 88400 Kota Kinabalu, Malaysia; css@ums.edu.my

\* Correspondence: yuandong\_liu@csu.edu.cn; Tel.: +86-731-88877472

**Citation:** He, J.; Liu, Y.; Zeng, X.; Tong, Y.; Liu, R.; Wang, K.; Shangguan, X.; Qiu, G.; Sipaut, C.S. Silicon Nitride Bioceramics Sintered by Microwave Exhibit Excellent Mechanical Properties, Cytocompatibility *In Vitro*, and Anti-Bacterial Properties. *J. Funct. Biomater.* **2023**, *14*, x. <https://doi.org/10.3390/xxxxx>

Academic Editor(s): \*\*

Received: 25 October 2023

Revised: 13 November 2023

Accepted: 15 November 2023

Published: date

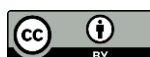

**Copyright:** © 2023 by the authors. Submitted for possible open access publication under the terms and conditions of the Creative Commons Attribution (CC BY) license (<https://creativecommons.org/licenses/by/4.0/>).

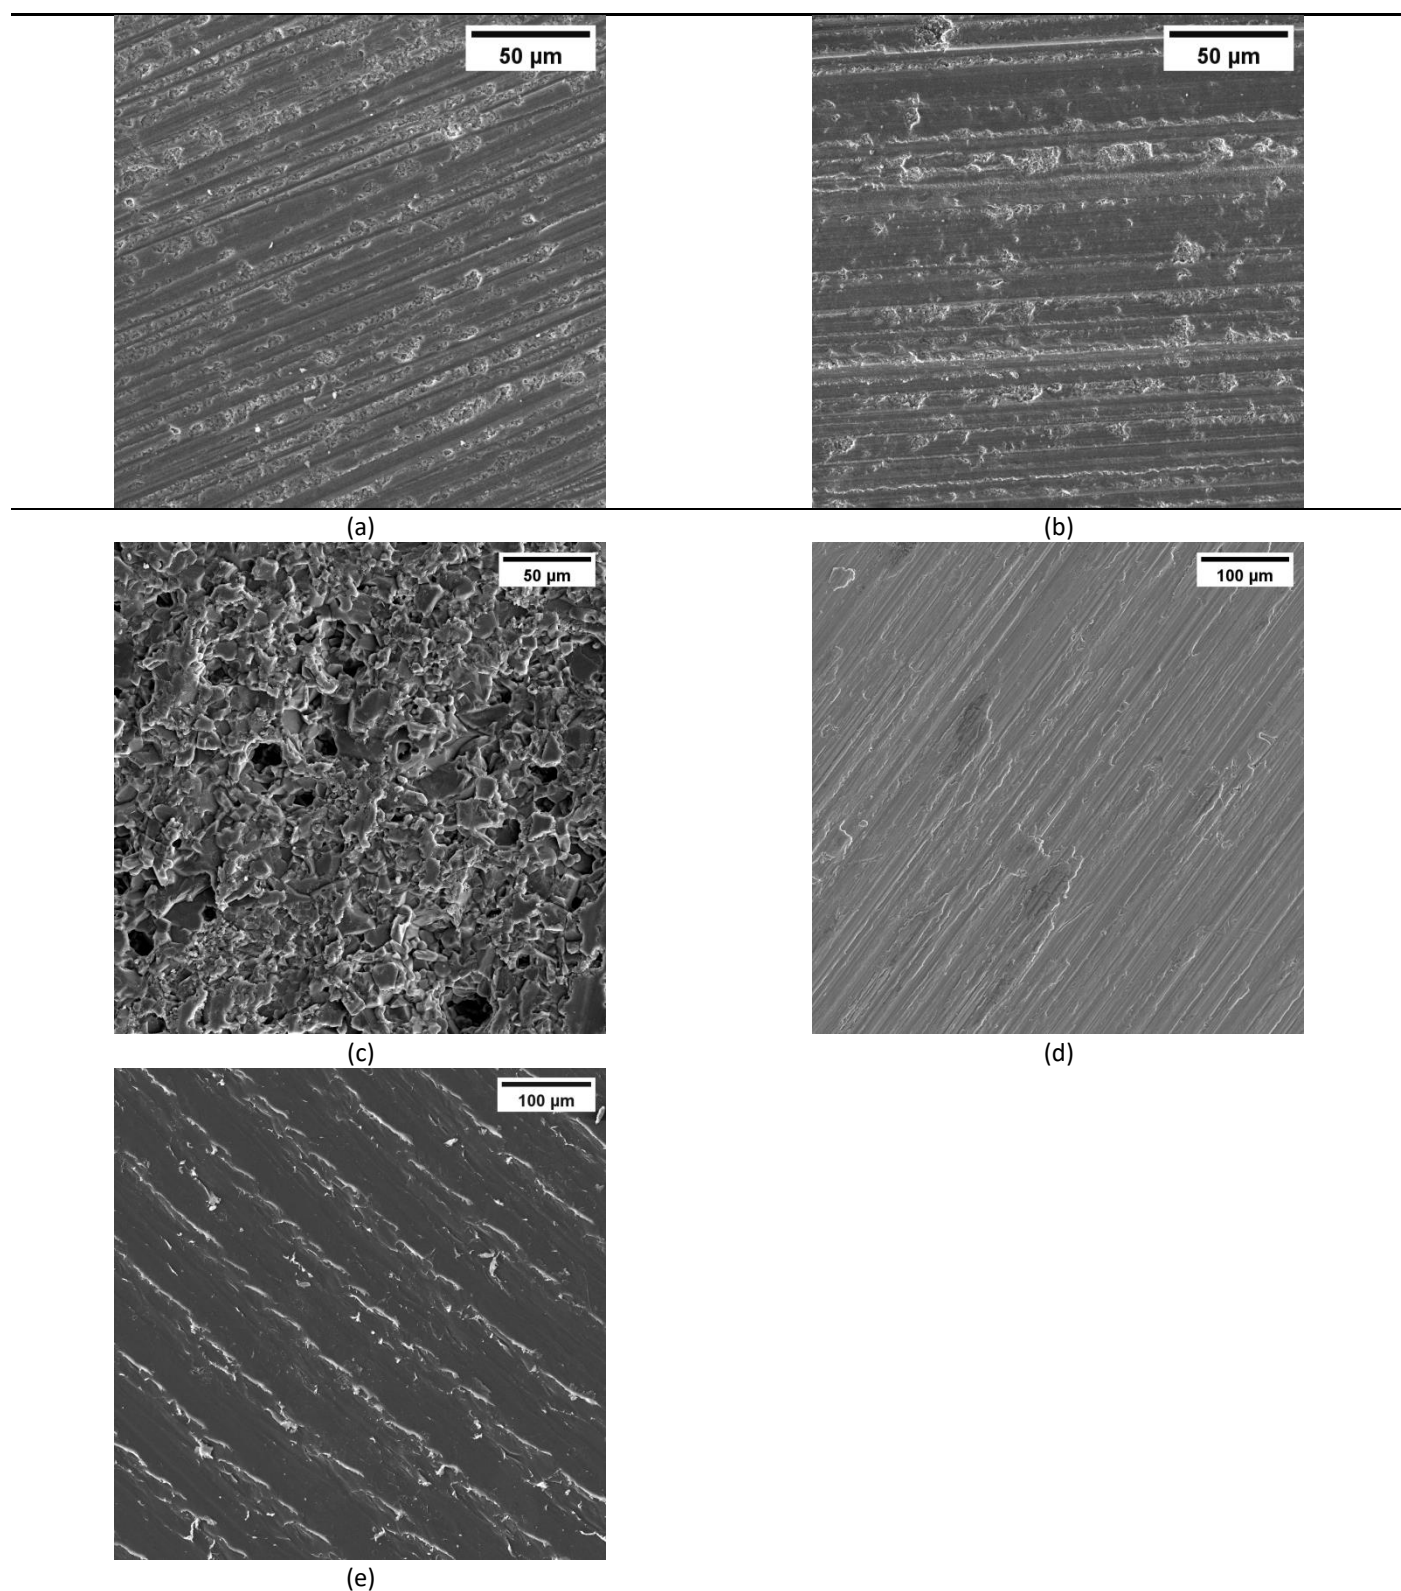

**Figure S1.** SEM images of materials surface ( **a**: MS silicon nitride, **b**: GPS silicon nitride, **c**: alumina ceramic, **d**: titanium alloy, **e**: PEEK ).

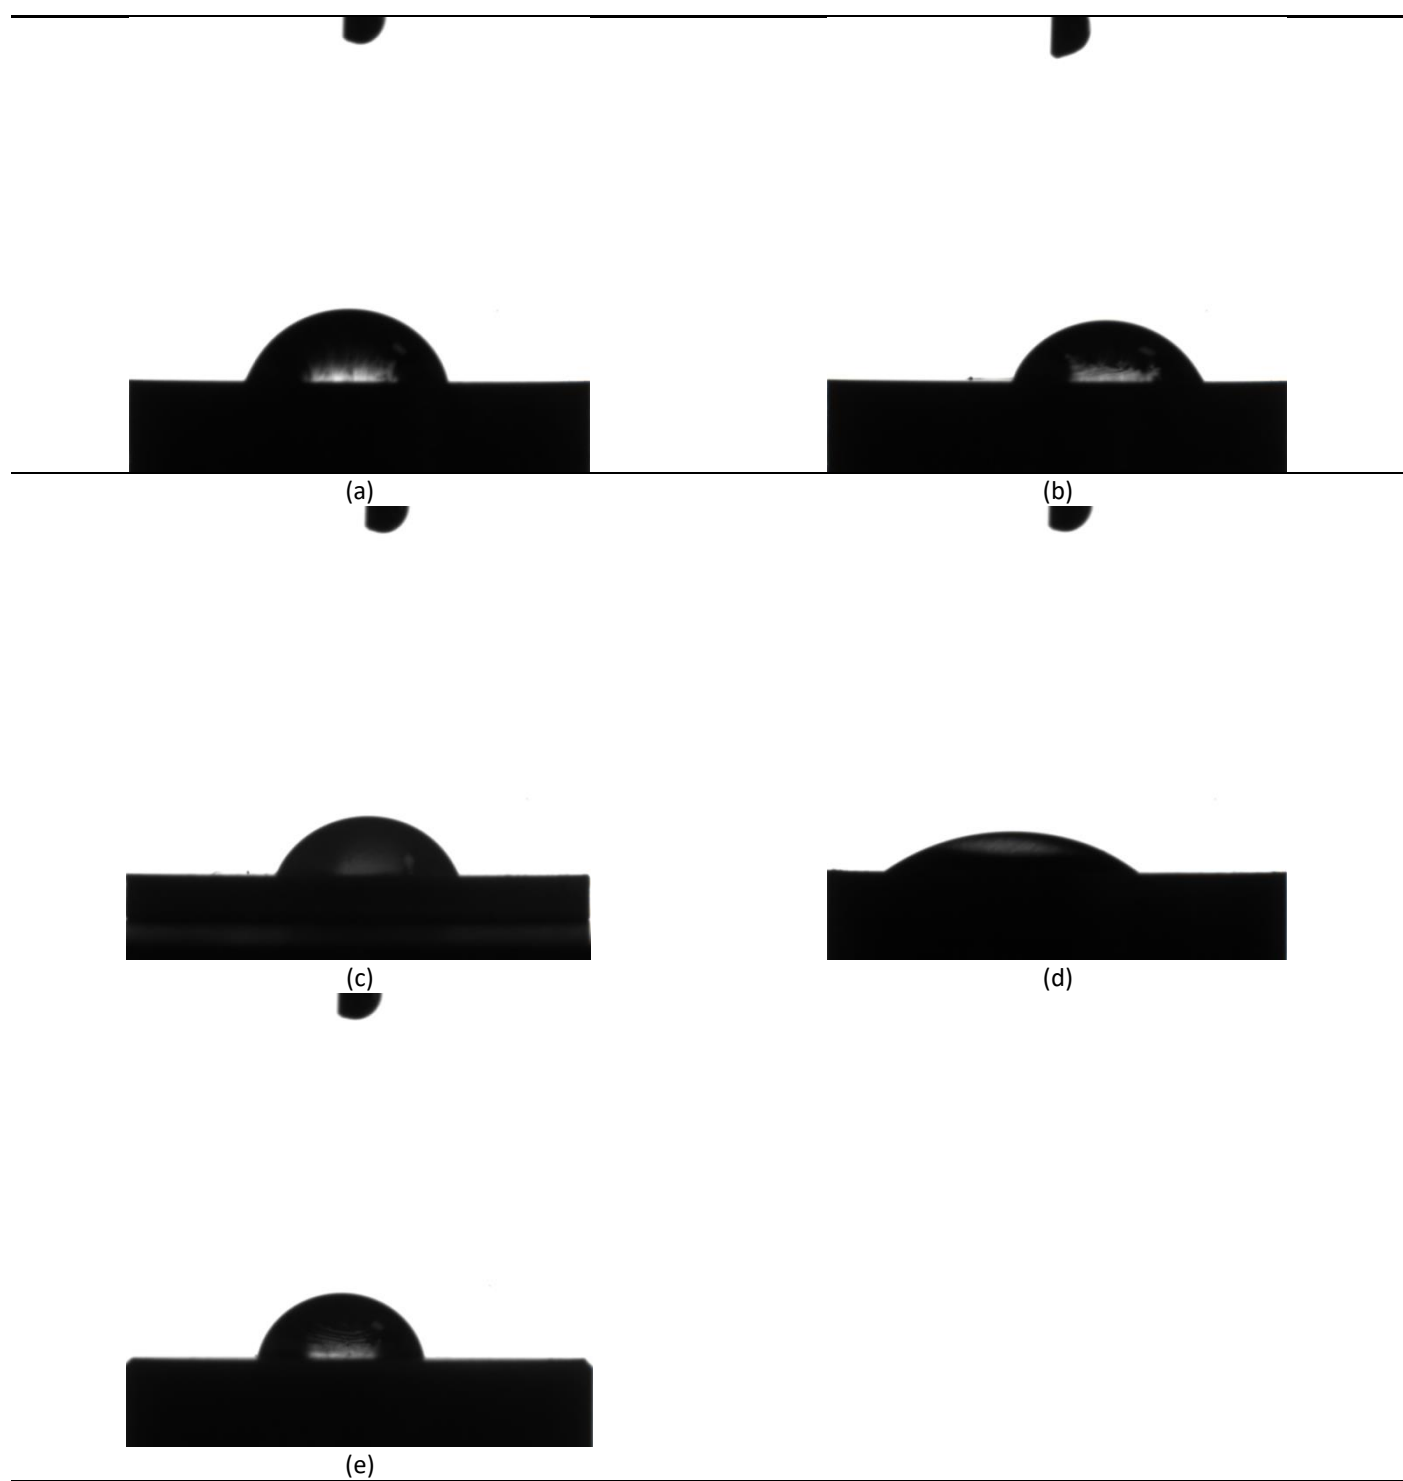

**Figure S2.** Wettability images of each material ( **a**: MS silicon nitride, **b**: GPS silicon nitride, **c**: alumina ceramic, **d**: titanium alloy, **e**: PEEK ).
